# Supplementary material
Source: PubMed Central journal article supplement (PMC3562592)
Supplement: NIHMS431319-supplement-1_si_001.pdf [file NIHMS431319-supplement-1_si_001.pdf]

# A binding site for non-steroidal anti-inflammatory drugs in FAAH

Laura Bertolacci,<sup>¶</sup> Elisa Romeo,<sup>¶</sup> Marina Veronesi, Paola Magotti, Clara Albani, Mauro Dionisi, Chiara Lambruschini, Rita Scarpelli, Andrea Cavalli,<sup>‡</sup> Marco De Vivo, Daniele Piomelli,<sup>\*,†</sup> and Gianpiero Garau<sup>\*</sup>

*Drug Discovery and Development, Istituto Italiano di Tecnologia, Via Morego 30, 16163 Genoa, Italy.*

## SUPPORTING INFORMATION

### Supplementary Figures and Tables

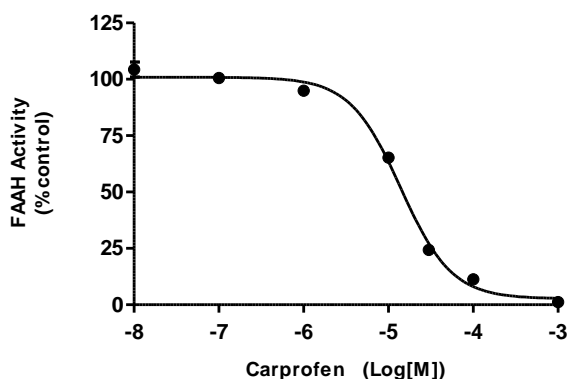

**Supplementary Figure 1.** Inhibition of FAAH activity by carprofen at pH 6.0 (●). FAAH activity was assessed in rat brain membrane using [<sup>3</sup>H]-anandamide as a substrate (Methods).

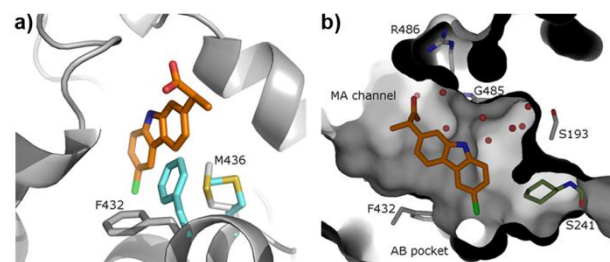

**Supplementary Figure 2.** Carprofen binding to the membrane access channel of FAAH. a) FAAH/carprofen interaction dynamics. The structure of the FAAH-carprofen complex is colored in gray (carprofen carbon atoms colored in orange). Residues F432 and M436 are superimposed with those of the FAAH/URB597 complex (PDB code: 3LJ7, carbon atoms in cyan) to show their different orientations. b) Position of carprofen (carbon atoms colored in orange) and O-carbamoylated (carbon atoms colored in dark green) catalytic S241. Water molecules of the membrane access channel

(MA) are shown as red spheres (AB, acyl binding). Single-letter abbreviations of amino acids have been used for clarity.

**Table 1.** Crystallographic analysis.

|                                                       | FAAH-Carprofen complex          |
|-------------------------------------------------------|---------------------------------|
| <i>Data collection</i>                                |                                 |
| Space group                                           | P2 <sub>1</sub> ,2 <sub>1</sub> |
| Cell dimensions                                       |                                 |
| a, b, c (Å)                                           | 103.47, 104.37, 147.62          |
| α, β, γ (deg)                                         | 90, 90, 90                      |
| Resolution (Å) <sup>a</sup>                           | 44.44 - 2.25 (2.37 - 2.25)      |
| R <sub>sym</sub> <sup>a, b</sup>                      | 0.11 (0.58)                     |
| I / σI <sup>a</sup>                                   | 15.9 (4.1)                      |
| Completeness (%) <sup>a</sup>                         | 99.8 (98.9)                     |
| Redundancy <sup>a</sup>                               | 11.6 (10.8)                     |
|                                                       |                                 |
| <i>Refinement statistics</i>                          |                                 |
| Resolution (Å) <sup>a</sup>                           | 44.44 - 2.25 (2.31-2.25)        |
| No. reflections                                       | 68597                           |
| R <sub>work</sub> / R <sub>free</sub> <sup>a, c</sup> | 0.164 (0.213) / 0.199 (0.271)   |
| No. atoms                                             | 8986                            |
| Protein                                               | 8431                            |
| Ligand / ion                                          | 57                              |
| Water                                                 | 533                             |
| B-factors                                             | 28.8                            |
| Protein                                               | 29.5                            |
| Ligand / ion                                          | 42.8                            |
| Water                                                 | 36.1                            |
| rms deviations                                        |                                 |
| Bond lengths (Å)                                      | 0.02                            |
| Bond angles (deg)                                     | 1.83                            |
| Ramachandran plot                                     |                                 |
| preferred (%)                                         | 96.2                            |
| allowed (%)                                           | 3.7                             |
| outliers (%)                                          | 0.1                             |

<sup>a</sup> In parentheses, values for the highest resolution shell data.

<sup>b</sup> R<sub>sym</sub> is defined as:  $\sum h \sum i (|I_i(h) - \langle I(h) \rangle|) / \sum h \sum i I_i(h)$ , where I<sub>i</sub>(h) is the i<sup>th</sup> integrated intensity of a given reflection and  $\langle I(h) \rangle$  is the weighted mean of all measurements of I(h).

<sup>c</sup> R<sub>free</sub> calculated on a subset of reflections excluded from all stages of refinement.

¶ These authors contributed equally.

‡ Department of Pharmaceutical Sciences, University of Bologna, Italy.

† Department of Pharmacology, Univ. of California, Irvine, California, USA.

\* To whom correspondence should be addressed.

E-mail: gianpiero.garau@iit.it; daniele.piomelli@iit.it

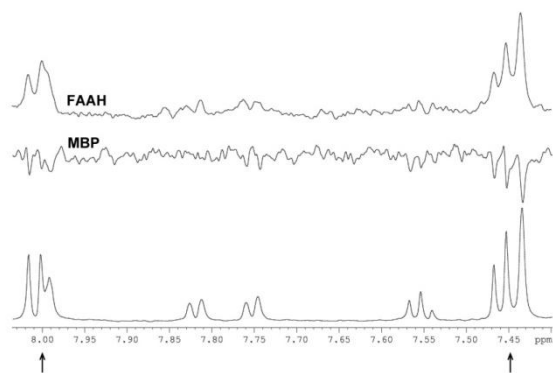

**Supplementary Figure 3.** WaterLOGSY binding experiments (BOX1). WaterLOGSY binding experiments recorded for FAAH (wild-type, maltose-binding protein (MBP)-fused FAAH) or MBP (0.7  $\mu$ M) showing the interaction of carprofen (200  $\mu$ M), in the presence of URB597 (100  $\mu$ M). NMR spectra indicate the presence (positive LOGSY signals) and absence (negative LOGSY signals) of interaction with FAAH and MBP, respectively. Bottom, aromatic region of the 1D 1H spectrum of carprofen (arrows) and URB597.

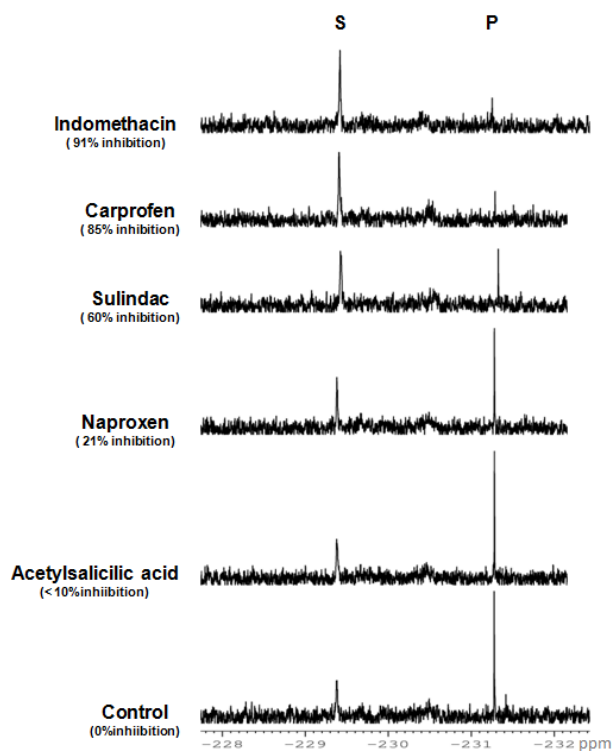

**Supplementary Figure 4.** FABS-based inhibition profile (BOX1) of representative NSAIDs.  $^{19}\text{F}$  NMR spectra show signals of the fluorinated anandamide analog ARN<sub>1302</sub> (S) and its reaction product (P). The concentration of FAAH and ARN<sub>1302</sub> was 15 nM and 30  $\mu$ M, respectively. From top to bottom,  $^{19}\text{F}$  NMR spectra were recorded in the presence or absence of select NSAIDs (200  $\mu$ M). The amount of product for each sample was obtained integrating its  $^{19}\text{F}$  NMR signal (Table 2). Two replicate measurements were carried out with a single point measurement.

## Supplementary BOX 1

### WaterLOGSY

WaterLOGSY is a powerful NMR-based methodology for the identification of compounds interacting with protein targets. The magnetization of the bulk water is partially transferred via the protein-ligand complex to the free ligand in a selective manner. As a result, the resonances of binding compounds appear with opposite sign and tend to be stronger than those of the non-interacting ligands (Dalvit C et al. *J. Biomol. NMR.* 2001, 21, 349–359).

### FABS

Fluorine Atoms for Biochemical Screening (FABS) requires the labeling of the substrate with a Fluorine-containing chemical moiety. FABS utilizes  $^{19}\text{F}$  NMR spectroscopy for the detection of the starting substrate and the enzyme reaction product. The method allows for high-quality screening of large compound collections, and for measuring their IC<sub>50</sub> values (Dalvit C et al. *J. Am. Chem. Soc.* 2003, 125, 14620–14625).

Table 2. FABS-based NMR spectroscopy.

| NSAID                | Chemical structure                                                                  | Concentration (μM) | Area S [-231.26; -231.29] (ppm) | Area P [-231.26; -231.29] (ppm) | S (μM) | P (μM) | % Inhibition | % Mean inhibition | Standard deviation |
|----------------------|-------------------------------------------------------------------------------------|--------------------|---------------------------------|---------------------------------|--------|--------|--------------|-------------------|--------------------|
| Indomethacin         |    | 200                | 1                               | 0,0294                          | 29,1   | 0,9    | 94           | 91                | 3,0                |
|                      |                                                                                     |                    |                                 | 0,056                           | 28,4   | 1,6    | 88           |                   |                    |
| Carprofen            |    | 200                | 1                               | 0,0634                          | 28,2   | 1,8    | 87           | 85                | 2,2                |
|                      |                                                                                     |                    |                                 | 0,0816                          | 27,7   | 2,3    | 82           |                   |                    |
| Tenidap              |    | 200                | 1                               | 0,2028                          | 24,9   | 5,1    | 63           | 66                | 3,7                |
|                      |                                                                                     |                    |                                 | 0,1473                          | 26,1   | 3,9    | 70           |                   |                    |
| Sulindac             |    | 200                | 1                               | 0,2061                          | 24,9   | 5,1    | 62           | 60                | 2,3                |
|                      |                                                                                     |                    |                                 | 0,2217                          | 24,6   | 5,4    | 58           |                   |                    |
| Flufenamic Acid      |    | 200                | 1                               | 0,3594                          | 22,1   | 7,9    | 41           | 42                | 0,8                |
|                      |                                                                                     |                    |                                 | 0,3232                          | 22,7   | 7,3    | 43           |                   |                    |
| Valdecoxib           |    | 200                | 1                               | 0,351                           | 22,2   | 7,8    | 42           | 42                | 0,3                |
|                      |                                                                                     |                    |                                 | 0,3309                          | 22,5   | 7,5    | 42           |                   |                    |
| Flurbiprofen         |    | 200                | 1                               | 0,3696                          | 21,9   | 8,1    | 40           | 40                | 0,2                |
|                      |                                                                                     |                    |                                 | 0,3478                          | 22,3   | 7,7    | 40           |                   |                    |
| Ibuprofen            |    | 200                | 1                               | 0,4662                          | 20,5   | 9,5    | 29           | 31                | 1,5                |
|                      |                                                                                     |                    |                                 | 0,4068                          | 21,3   | 8,7    | 32           |                   |                    |
| Diclofenac           |    | 200                | 1                               | 0,4768                          | 20,3   | 9,7    | 28           | 29                | 0,3                |
|                      |                                                                                     |                    |                                 | 0,437                           | 20,9   | 9,1    | 29           |                   |                    |
| Naproxen             |  | 200                | 1                               | 0,5511                          | 19,3   | 10,7   | 21           | 21                | 0,3                |
|                      |                                                                                     |                    |                                 | 0,5028                          | 20,0   | 10,0   | 22           |                   |                    |
| Tenoxicam            |  | 200                | 1                               | 0,5714                          | 19,1   | 10,9   | 19           | 20                | 0,7                |
|                      |                                                                                     |                    |                                 | 0,5121                          | 19,8   | 10,2   | 21           |                   |                    |
| Lumiracoxib          |  | 200                | 1                               | 0,67                            | 18,0   | 12,0   | 11           | 20                | 8,9                |
|                      |                                                                                     |                    |                                 | 0,4385                          | 20,9   | 9,1    | 29           |                   |                    |
| Mefenamic Acid       |  | 200                | 1                               | 0,5974                          | 18,8   | 11,2   | 17           | 17                | 0,2                |
|                      |                                                                                     |                    |                                 | 0,5449                          | 19,4   | 10,6   | 17           |                   |                    |
| Piroxicam            |  | 200                | 1                               | 0,5918                          | 18,8   | 11,2   | 17           | 16                | 1,4                |
|                      |                                                                                     |                    |                                 | 0,5741                          | 19,1   | 10,9   | 15           |                   |                    |
| Sulfinpyrazone       |  | 200                | 1                               | 0,6596                          | 18,1   | 11,9   | 12           | 12                | 0,3                |
|                      |                                                                                     |                    |                                 | 0,5997                          | 18,8   | 11,2   | 12           |                   |                    |
| Nabumetone           |  | 200                | 1                               | 0,7759                          | 16,9   | 13,1   | 3            | < 10              |                    |
|                      |                                                                                     |                    |                                 | 0,6967                          | 17,7   | 12,3   | 4            |                   |                    |
| Ketoprofen           |  | 200                | 1                               | 0,8165                          | 16,5   | 13,5   | 0            | < 10              |                    |
|                      |                                                                                     |                    |                                 | 0,6806                          | 17,9   | 12,1   | 5            |                   |                    |
| Etodolac             |  | 200                | 1                               | 0,7632                          | 17,0   | 13,0   | 4            | < 10              |                    |
|                      |                                                                                     |                    |                                 | 0,6936                          | 17,7   | 12,3   | 4            |                   |                    |
| Acetaminophen        |  | 200                | 1                               | 0,8081                          | 16,6   | 13,4   | 1            | < 10              |                    |
|                      |                                                                                     |                    |                                 | 0,7087                          | 17,6   | 12,4   | 3            |                   |                    |
| Acetylsalicylic acid |  | 200                | 1                               | 0,7842                          | 16,8   | 13,2   | 2            | < 10              |                    |
|                      |                                                                                     |                    |                                 | 0,6889                          | 17,8   | 12,2   | 4            |                   |                    |
| control              |                                                                                     |                    | 1                               | 0,8181                          | 16,5   | 13,5   |              |                   |                    |
|                      |                                                                                     |                    |                                 | 0,8194                          | 16,5   | 13,5   |              |                   |                    |
|                      |                                                                                     |                    |                                 | 0,7315                          | 17,3   | 12,7   |              |                   |                    |
|                      |                                                                                     |                    |                                 | 0,7595                          | 17,1   | 12,9   |              |                   |                    |

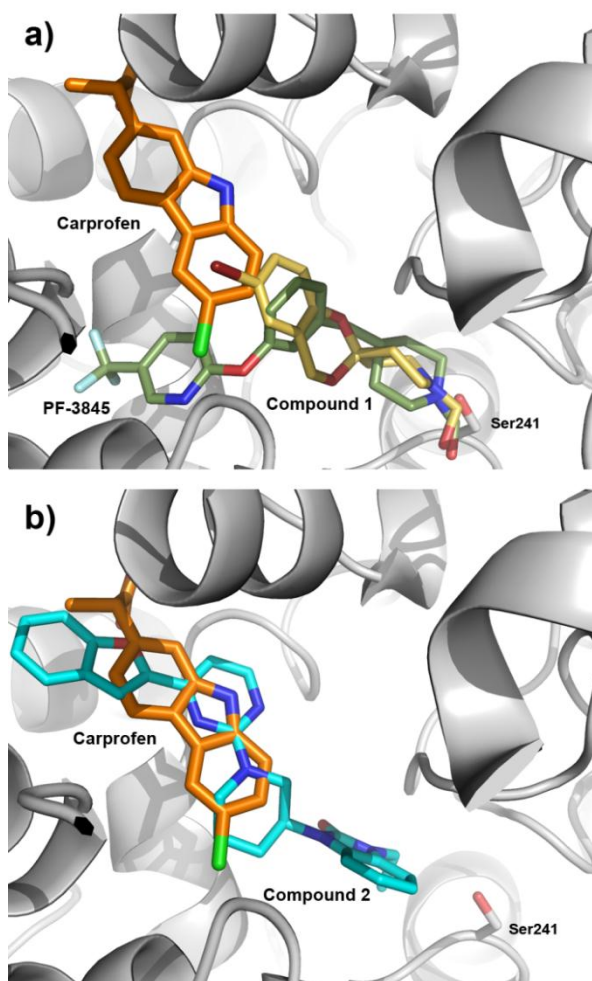

**Supplementary Figure 5.** Mode of binding of carprofen and representative FAAH inhibitors. a) Non-covalent binding of carprofen (carbon atoms colored in orange) to FAAH, and position of the covalent inhibitors PF-3845 (carbon atoms colored in dark green) and Compound 1 [6-bromo-1'H,4H-spiro[1,3-benzodioxine-2,4'-piperidin]-1'-yl)methanol] (carbon atoms colored in pale yellow) (Min X. et al. *Proc. Natl. Ac. Sci.* **2011**, 108, 7379–7384). The crystallographic bound conformation of these inhibitors (PDB ID: 2WAP and 3QKV) was superimposed on that of the FAAH/carprofen complex (PDB ID: 4DO3). The residue Ser241 is the enzyme nucleophile. b) Binding of carprofen and Compound 2 [1-((3S)-1-[4-(1-benzofuran-2-yl)pyrimidin-2-yl]piperidin-3-yl)-3-ethyl-1,3-dihydro-2H-benzimidazol-2-one] (carbon atoms colored in cyan) (Min X. et al. *Proc. Natl. Ac. Sci.* **2011**, 108, 7379–7384). The crystallographic bound conformation of Compound 2 (PDB ID: 3QJ9) was superimposed on that of the FAAH/carprofen complex (PDB ID: 4DO3). Compound 2, which has no structural analogy with carprofen, occupies entirely the MA channel of FAAH, and was designed and synthesized starting from suicide urea inhibitors (Gusting D.J. et al. *Bioorg. Med. Chem. Lett.* **2011**, 21, 2492–2496).

## Methods

**Materials.** Compounds were purchased from Sigma-Aldrich (St. Louis, MO, USA). Chemically competent DH5 $\alpha$  and BL21(DE3) cells were from Novagen (Merck - Darmstadt, Germany). Vectors, restriction enzymes and T4 DNA ligase were from New England BioLabs (Ipswich, MA, USA). Centricons were from Sartorius (Goettingen, Germany) and dialysis cassettes from Pierce (Thermo Fisher Scientific Inc. - Rockford, IL, USA). NuPAGE Mini Gels were from Life technologies (Life Technologies - Paisley PA4 9RF, UK). Arachidonoyl ethanolamide (AEA) was purchased from Cayman chemical (item No. 90050, Ann Arbor, MI, USA); Arachidonyl-[1- $^3$ H] ethanolamine ( $^3$ H]-AEA) was from American radiolabel Chemicals Inc. (Item No. ART 0626, Saint Louis, MO, USA).

**Construct generation and mutagenesis.** The encoding sequence of rat (r)FAAH $\Delta$ TM (97-1722bp) was amplified from the cDNA clone 7370226 (Open Biosystem) using the following primer pair: forward 5'-GGGAATTCATATGGGGCGCCAGAAGGCC-3' (NdeI site is underlined); reverse 5'-ATAGTTTACGGCCGCTCAATGATGATGATGATGAGGGGTCATCAGCTG-3' (NotI site is underlined). A (6x)Histidine tag was introduced in the reverse primer sequence (colored in bold). To obtain the construct MBP-rFAAH-6xHis pMALc5x, the amplified rFAAH $\Delta$ TM was cloned in pMALc5x vector in frame with the N-terminal MBP. For the generation of the construct (6x)His-rFAAH-(6x)His pET28, NdeI and EcoRI restriction enzymes were used to move the rFAAH-(6x)His sequence from MBP-rFAAH-(6x)His pMALc5x construct to pET28, in frame with the vector N-terminal (6x)His tag. Mutagenesis was performed using QuickChange Site-Directed Mutagenesis Kit (Agilent Technologies, Santa Clara, CA, USA) following manufacturer's instructions, the construct (6x)His-rFAAH-(6x)His pET28 was used as template. The following primers were designed to introduce the single point-mutation Thr488Ala in rFAAH: forward 5'-CACCGGGCAGAGCCGCGAGGGGCTATCAGC-3' and reverse 5'-GCTGATAGCCCTGCGGCTCTGCCCGGTG-3'.

**Protein expression and purification.** Expression of the MBP-rFAAH-6xHis protein was carried out in the E. coli strain Rosetta gami 2 (DE3)pLysS (Novagen). At an optical density (OD<sub>600</sub>) of 0.6, bacteria were induced by the addition of 0.25 mM IPTG for 16h at 25 °C. Cells were then harvested by centrifugation, resuspended in buffer [sodium phosphate 50 mM, sodium chloride 0.3 M, imidazole 10 mM pH 7.4] and lysed by sonication and 1% Triton-X100 addition. The lysate was incubated for 1h with benzonase nuclease and centrifuged at 15,000xg for 30 min. The clarified supernatant was incubated for 2h with NiNTA Agarose (Qiagen, Germantown, MD, USA) and washed with buffer containing increasing concentrations of imidazole. Elution was performed with buffer containing 0.25 M Imidazole. BL21 codon plus (DE3)-RIPL cells (Agilent Technologies, Santa Clara, CA, USA) were used to express the 6xHis-rFAAH-6xHis protein, both wild

type and mutant. At an OD<sub>600</sub> of 0.6, cells were induced by the addition of 0.1 mM IPTG for 16h at 25 °C. Cells were then harvested, resuspended in Buffer A [sodium phosphate 20 mM, sodium chloride 0.1 M, pH 7.8], and disrupted by lysozyme-induced lysis and sonication. Buffer A was supplemented with 50 μM URB597 for the purification of rFAAH to be used for crystallization. The cell lysate was centrifuged at 100,000g for 1h. Pellets were resuspended in Buffer A and centrifuged again at 100,000g for 1h. This last step was repeated 3 times. Finally the membrane pellet was solubilized with Buffer B [sodium phosphate 20 mM, sodium chloride 0.5 M, 1% Triton X100 pH 7.8] and centrifuged at 100,000g for 1h. The supernatant was incubated with NiNTA affinity resin overnight at 4 °C. The resin was washed using Buffer B containing increasing concentrations of imidazole. Protein was eluted with a buffer containing [20mM Hepes pH 7.0, NaCl 0.1 M, 0.02% n-undecyl-β-D-maltoside, and 0.5 M Imidazole]. Finally, the eluted sample was supplemented with 2mM dithiothreitol and 2mM ethylenediaminetetraacetic acid. For purification in the absence of URB597 (rFAAH apo-protein wt and T488A mutant), 10% glycerol was added to the elution buffer.

**General experimental details for synthesis.** All the commercial available reagents and solvents were used as purchased from vendors without further purification. Abbreviations for solvents and reagents are: acetic acid (AcOH), acetonitrile (MeCN), cyclohexane (Cy), dichloromethane (DCM), dimethylsulfoxide (DMSO), ethylacetate (EtOAc), *N,N*-dimethylformamide (DMF) and triethylamine (Et<sub>3</sub>N). Automated column chromatography purifications were run using a Teledyne ISCO apparatus (CombiFlash® Rf) with pre-packed silica gel columns of different sizes (from 4 g up to 24 g). NMR experiments were run on a Bruker Avance III 400 system (400.13 MHz for <sup>1</sup>H, and 100.62 MHz for <sup>13</sup>C), equipped with a BBI probe and Z-gradients. Spectra were acquired at 300 K, using deuterated dimethylsulfoxide (DMSO-*d*<sub>6</sub>) or deuterated chloroform (chloroform-*d*) as solvents. Chemical shifts (δ) for <sup>1</sup>H and <sup>13</sup>C spectra are reported in parts per million (ppm) using the residual non-deuterated solvent resonance as the internal standard (for chloroform-*d*: 7.26 ppm, <sup>1</sup>H and 77.16 ppm, <sup>13</sup>C; for DMSO-*d*<sub>6</sub>: 2.50 ppm, <sup>1</sup>H; 39.52 ppm, <sup>13</sup>C). Data are reported as follows: chemical shift (sorted in ascending order), multiplicity (indicated as: s, singlet; d, doublet; t, triplet; q, quartet; p, pentet; m, multiplet and combinations thereof), coupling constants (*J*) in Hertz (Hz) and integration. UPLC-MS analyses were run on a Waters ACQUITY UPLC-MS system consisting of a SQD (Single Quadrupole Detector) Mass Spectrometer (MS) equipped with an Electrospray Ionization (ESI) interface and a Photodiode Array (PDA) Detector. PDA range was 210–400 nm. Analyses were performed on an ACQUITY UPLC HSS T<sub>3</sub> C<sub>18</sub> column (50 × 2.1 mm ID, particle size 1.8 μm) with a Van-Guard HSS T<sub>3</sub> C<sub>18</sub> pre-column (5 × 2.1 mm ID, particle size 1.8 μm). Mobile phase was (A) 10 mM NH<sub>4</sub>OAc in H<sub>2</sub>O at pH 5 and (B) 10 mM NH<sub>4</sub>OAc in MeCN/H<sub>2</sub>O (95:5) at pH 5, gradient either 5% to 95% B or 50% to 100% B over 3 min, flow rate 0.5 mL/min, temperature 40°C. Electrospray ionization in positive and negative mode was applied. Purifications by preparative HPLC-MS were run on a Waters Autopurification

system consisting of a 3100 Single Quadrupole Mass Spectrometer equipped with an Electrospray Ionization interface and a 2998 Photodiode Array Detector. HPLC system included a 2747 Sample Manager, 2545 Binary Gradient Module, System Fluidic Organizer and 515 HPLC Pump. PDA range was 210–400 nm. Purifications were performed on a XBridge™ Prep C<sub>18</sub> OBD column (100 × 19 mm ID, particle size 5 μm) with a XBridge™ Prep C<sub>18</sub> (10 × 19 mm ID, particle size 5 μm) Guard Cartridge. Mobile phase was (A) H<sub>2</sub>O and (B) MeCN, gradient 80% to 90% B over 7 min with a flow rate of 20 mL/min, temperature 25°C. Electrospray ionization in positive and negative mode was used.

**Synthesis of (5Z, 8Z, 11Z, 14Z)-N-(3-fluoro-2-hydroxy-propyl)icosa-5,8,11,14-tetraenamide (ARN1203).** **Step1:** To a suspension of potassium phthalimide (300 mg, 1.60 mmol) in dry DMF (3.2 mL) was added 1-chloro-3-fluoro-propan-2-ol (150 mg, 1.33 mmol) at room temperature. After stirring at 80 °C for 4 h, the reaction was cooled to room temperature and H<sub>2</sub>O (5 mL) was added. The reaction mixture was extracted with EtOAc (5 × 15 mL), and the organic layer was washed with brine and dried over Na<sub>2</sub>SO<sub>4</sub>. After evaporation of the solvent, the crude was purified by automated column chromatography eluting with Cy/EtOAc (from 100:0 to 75:25) to afford 2-(3-fluoro-2-hydroxy-propyl)isoindoline-1,3-dione (180 mg, 61%) as white solid. <sup>1</sup>H NMR (400 MHz, chloroform-*d*) δ 2.71 (s, 1H), 3.90–3.95 (m, 2H), 4.16 (dp, *J* = 20.0, 4.9 Hz, 1H), 4.47 (ddd, *J* = 47.0, 9.8, 4.7 Hz, 1H), 4.51 (ddd, *J* = 47.2, 9.8, 4.1 Hz, 1H), 7.75 (dd, *J* = 5.5, 3.1 Hz, 2H), 7.88 (dd, *J* = 5.5, 3.1 Hz, 2H); MS (ESI) *m/z*: [M+H]<sup>+</sup> calcd for C<sub>11</sub>H<sub>11</sub>FNO<sub>3</sub> 224.07; found 224.1. **Step2:** A suspension of 2-(3-fluoro-2-hydroxy-propyl)isoindoline-1,3-dione (125 mg, 0.56 mmol) in 13% HCl solution (1 mL) was stirred at 100 °C overnight. The reaction was then cooled to room temperature and H<sub>2</sub>O was added. The mixture was washed with EtOAc (3 × 15 mL) and the aqueous phase was evaporated under reduced pressure to dryness to afford 1-amino-3-fluoro-propan-2-ol hydrochloride (66 mg, 92%) as white solid. <sup>1</sup>H NMR (400 MHz, DMSO-*d*<sub>6</sub>) δ 2.68–3.01 (m, 2H), 3.88–4.01 (m, 1H), 4.37 (ddd, *J* = 47.2, 9.7, 4.8 Hz, 1H), 4.41 (ddd, *J* = 47.2, 9.6, 4.3 Hz, 1H), 5.80 (s, 1H), 7.99 (s, 3H); MS (ESI) *m/z*: [M+H]<sup>+</sup> calcd for C<sub>3</sub>H<sub>7</sub>FNO 94.07; found 93.9. **Step3:** To a solution of arachidonic acid (100 mg, 0.33 mmol) in dry DCM (2 mL) DMF (1 μL, 0.01 mmol) and oxalyl chloride (55 μL, 0.66 mmol) were added at 0 °C under N<sub>2</sub> atmosphere. After stirring for 3 h, the solvent was removed under reduced pressure and the crude was washed with dry DCM (3 × 2 mL, evaporation after each step). The residue was then dissolved in dry DCM (2 mL) under N<sub>2</sub> atmosphere and added via cannula to a solution of dry Et<sub>3</sub>N (120 μL, 0.82 mmol) and 1-amino-3-fluoro-propan-2-ol hydrochloride (55 mg, 0.43 mmol) in dry DCM (2.5 mL) at 0 °C. After stirring overnight at room temperature, a 2N HCl solution (15 mL) was added. The reaction mixture was extracted with DCM (3 × 15 mL), and the organic layer was washed with brine and dried over Na<sub>2</sub>SO<sub>4</sub>. After evaporation of the solvent, the crude was purified by preparative HPLC-MS to afford (5Z, 8Z, 11Z, 14Z)-N-(3-fluoro-2-hydroxy-propyl)icosa-5,8,11,14-tetraenamide (ARN1203) (64 mg, 51%) as colorless oil. <sup>1</sup>H NMR (400 MHz, DMSO-*d*<sub>6</sub>) δ 0.85 (t, *J* = 6.8 Hz, 3H), 1.20–1.37 (m, 6H), 1.54 (p, *J* = 7.5 Hz, 2H), 1.97–2.06 (m, 4H), 2.09 (t, *J* = 7.5 Hz, 2H), 2.71–2.88 (m, 6H), 3.00–3.17 (m, 2H),

3.62–3.78 (m, 1H), 4.24 (ddd,  $J = 47.9, 9.6, 5.7$  Hz, 1H), 4.31 (ddd,  $J = 47.6, 9.6, 3.6$  Hz, 1H), 5.18 (d,  $J = 5.2$  Hz, 1H), 5.27–5.43 (m, 8H), 7.83 (t,  $J = 5.5$  Hz, 1H);  $^{13}\text{C}$  NMR (101 MHz, DMSO- $d_6$ )  $\delta$  13.89, 21.94, 25.18, 25.20, 25.23, 26.27, 26.59, 28.69, 30.86, 34.73, 40.75 (d,  $J = 8.1$  Hz), 68.23 (d,  $J = 18.6$  Hz), 85.10 (d,  $J = 168.3$  Hz), 127.49, 127.65, 127.76, 127.98, 128.10, 129.39, 129.92, 172.25; MS (ESI)  $m/z$ :  $[\text{M}+\text{H}]^+$  calcd for  $\text{C}_{23}\text{H}_{39}\text{FNO}_2$  380.30; found 380.4;  $[\text{M}-\text{H}]^-$  calcd for  $\text{C}_{23}\text{H}_{37}\text{FNO}_2$  378.28; found 378.2.

**NMR.** All spectra were recorded at 298 K using a Bruker FT-NMR 600 MHz Ultrashield<sup>TM</sup> Plus ADVANCE III equipped with a Cryoptobe QCI  $^1\text{H}/^{19}\text{F} - ^{13}\text{C}/^{15}\text{N} - \text{D}$  and a Samplejet autosampler with temperature control. Water suppression in all proton experiments was achieved with the excitation sculpting sequence. WaterLOGSY experiments were carried out using a 25 ms 1800 Gaussian pulse. SPAM approach [Dalvit C et al. *Curr Drug Disc. Technol.* 2006, 3, 115-124] was applied to test solubility, purity and aggregation of the molecules. For analysis, protein samples of MBP-fusion protein in [PBS pH 7.4, 0.05% Triton-X100] buffer was added with  $\text{D}_2\text{O}$  (8% final concentration) for the lock signal. Before use, inhibitors were dissolved in DMSO at 100 mM, and the substrate-analogue ARN1203 in DMSO- $d_6$  at 5 mM. The n-FABS screening was performed in [PBS pH 7.4, 0.05% Triton, 8%  $\text{D}_2\text{O}$ ] buffer in an end-point format using 15nM protein and 30  $\mu\text{M}$  ARN1203. The reactions were performed (at 25°C and 350 rpm) in vial tubes in the absence or presence of 200  $\mu\text{M}$  of each inhibitor. After 310 minutes, reactions were quenched adding 40  $\mu\text{M}$  of URB597. Samples were then transferred to 5 mm NMR tubes for analysis.  $^{19}\text{F}$  spectra were recorded with proton decoupling [spectral width 45,556 Hz, acquisition time 0.4 s, relaxation delay 2.5 s] in an automated way. Actual concentration of the screened compounds in the sample was monitored recording a  $^1\text{H} \ ^1\text{D}$  NMR spectrum after each  $^{19}\text{F}$ -based analysis. Concentration of the reaction product in each sample was calculated from the integrals of the  $^{19}\text{F}$  NMR signals of substrate and product. Data were analyzed with GraphPad Prism 5 software package.

**In vitro assay.** FAAH activity was measured by incubating for 30 min at 37°C the substrate (1 $\mu\text{M}$  cold anandamide and 0.6 nM [ $^3\text{H}$ ]-anandamide in the presence of either 50  $\mu\text{g}$  of total rat brain homogenate or 100ng of recombinant 6xHis-rFAAH-6xHis (wild type or mutated) protein, in assay buffer containing 50mM TRIS pH 6.0, 0.05% fatty acid free BSA (Item No. A-8806, Sigma-Aldrich). Rat brain homogenates were obtained from male Sprague Dawley rats (100-125g). Samples were homogenized in Tris HCl 20mM, sucrose 0.32 M, pH 7.4 using glass potter. The homogenate was centrifuged at 1000xg for 15 minutes and the supernatant was recovered for the assay.

FAAH activity reactions were stopped with cold 1:1  $\text{CHCl}_3$ /methanol. The aqueous phase was counted by liquid scintillation (Microbeta2 Lumijet, Perkin Elmer Inc., MA-USA: adapted from Kathuria et al, 2003). Inhibitors were pre-incubated in assay at appropriate concentration for 10 minutes prior to substrate addition.

**Structure determination.** Protein was dialyzed to remove the excess of imidazole, concentrated to 20 mg/ml, and sup-

plemented to give final concentration of 1 mM of carprofen, 3% xylitol, and 1.6 % benzyl-dimethyl-dodecyl-ammonium bromide (Sigma). Crystals were grown at 16°C by sitting drop vapor diffusion in 96-well plates, using a reservoir containing 30% polyethylene glycol-400, 100 mM TRIS-HCl pH 7.5, and 100 mM magnesium chloride. Crystals were flash frozen, and data were collected at the BM14 beamline of the European Synchrotron Radiation Facility (ESRF) in Grenoble (France). The structure of the complex was determined at 2.25 Å resolution by molecular replacement, using the (monomer A) protein coordinates from the isomorphous humanized rFAAH-URB597 complex (3LJ7) as a search model, and the program MOLREP [Vagin A & Teplyakov A. *J. Appl. Cryst.* 1997, 30, 1022-1025]. The structure was refined using WinCOOT [Emsley P, Lohkamp B, Scott WG & Cowtan K. *Acta Cryst. D*66, 2010, 486-501], Refmac5 [Vagin A, Stiner RS, Lebedev AA, Potterton L, McNicholas S, Long F & Murshudov GN. *Acta Cryst D*60, 2004, 2284-2295], and other programs included in the CCP4 package suite [Winn MD, Ballard CC, Cowtan KD, Dodson EJ, Emsley P, Evans PR, Keegan RM, Krissinel EB, Leslie AGW, McCoy A, McNicholas SJ, Murshudov GN, Pannu NS, Potterton EA, Powell HR, Read RJ, Vagin A & Wilson KS. *Acta Cryst D*67, 2011]. The final refinement statistics of the complex is shown in Supplementary Results, Table 1. The atomic coordinates and structure factors have been deposited in the Protein Data Bank (<http://www.rcsb.org>) with accession code 4DO3. Figures were prepared using PyMOL (<http://pymol.sourceforge.net>).

## AUTHOR INFORMATION

### Corresponding Author

Unit of Drug Discovery and Development, Italian Institute of Technology, Via Morego 30, 16163 Genoa, Italy.

E-mail: gianpiero.garau@iit.it, daniele.piomelli@iit.it
